# Supplementary material
Source: PubMed Central journal article supplement (PMC5807532)
Supplement: jnm196063SupplementaryData.pdf [file jnm196063SupplementaryData.pdf]

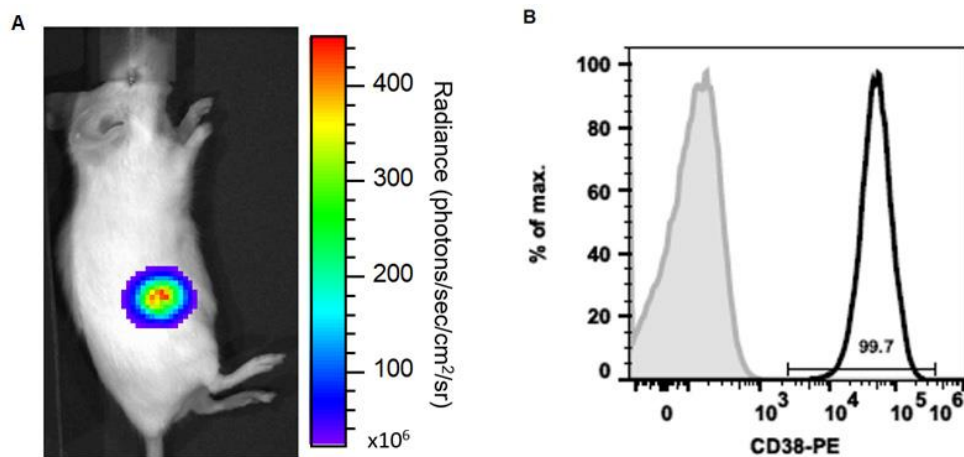

**Supplemental Figure 1.** (A) Representative bioluminescence image of a SCID mouse bearing s.c MM1.S tumor in the flank; (B) Flow cytometry was performed on the extracted tumor (from mouse shown in left) to demonstrate that high CD38 expression was retained on the MM1.S tumors *in vivo*.

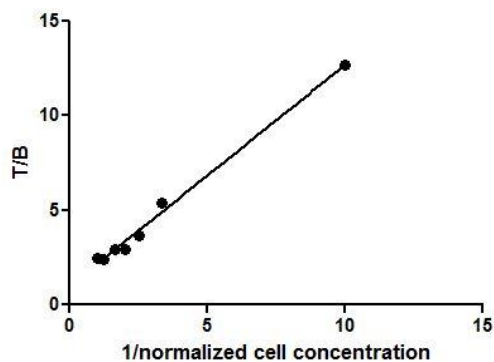

**Supplemental Figure 2.** The immunoreactivity of [<sup>89</sup>Zr]Zr-DFO-daratumumab was estimated by measuring the binding of a constant concentration of [<sup>89</sup>Zr]Zr-DFO-daratumumab to increasing numbers of MM1.S MM cells. This is a double-inverse plot of a triplicate assay. T/B=Total Activity/Bound Activity

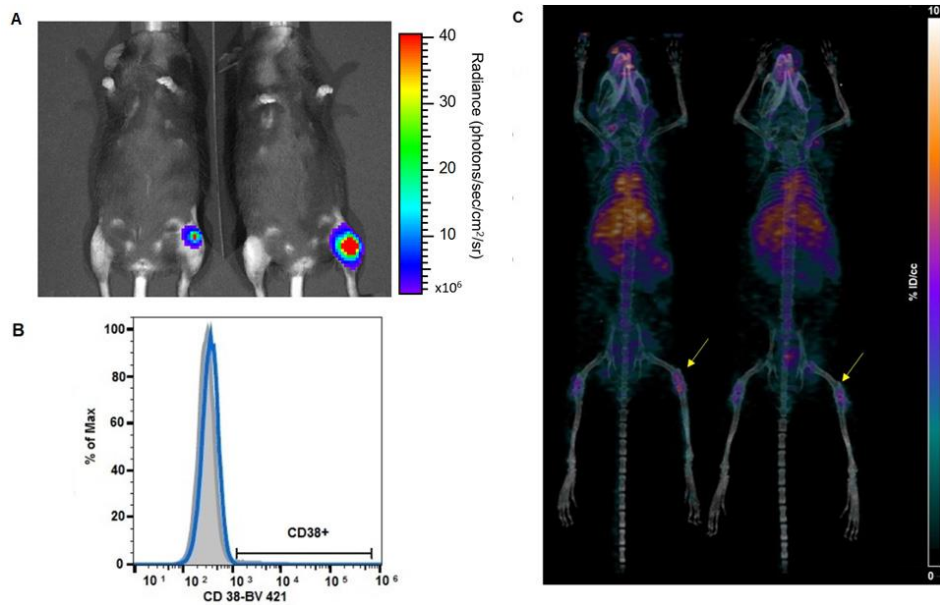

**Supplemental Figure 3.** Enhanced permeability and retention tumor noise control. (A) Bioluminescence images of the intra-tibial 5TGM1-GFP-*luc* (5TGM1) tumor bearing KaLwRij syngeneic mice; (B) Flow cytometry data showed less than 1% CD38-positive expression in murine 5TGM1 MM cells; (C) [<sup>89</sup>Zr]Zr-DFO-daratumumab/PET/CT MIP images of the i.t. 5TGM1/KaLwRij mice at 7 days post injection of the radiopharmaceutical. [<sup>89</sup>Zr]Zr-DFO-daratumumab was not-retained in the 5TGM1/KaLwRij mouse model.

| <b>ORGAN</b>             | <b>% ID/g</b> |
|--------------------------|---------------|
| <b>Blood</b>             | 11.34 ± 0.25  |
| <b>Lungs</b>             | 7.14 ± 0.55   |
| <b>Liver</b>             | 8.68 ± 0.92   |
| <b>Spleen</b>            | 25.57 ± 3.39  |
| <b>Kidney</b>            | 6.28 ± 0.64   |
| <b>Muscle</b>            | 2.17 ± 0.15   |
| <b>Fat</b>               | 1.45 ± 0.52   |
| <b>Heart</b>             | 4.13 ± 0.34   |
| <b>Bone</b>              | 7.93 ± 0.78   |
| <b>Adrenals</b>          | 4.76 ± 0.54   |
| <b>Pancreas</b>          | 2.02 ± 0.37   |
| <b>Stomach</b>           | 0.93 ± 0.23   |
| <b>Sm intestine</b>      | 1.65 ± 0.18   |
| <b>U large intestine</b> | 1.21 ± 0.15   |
| <b>L large intestine</b> | 1.13 ± 0.15   |

**Supplemental Table 1:** Tissue biodistribution of [<sup>89</sup>Zr]Zr-DFO-daratumumab in non-tumor SCID mice (n=4) at 7 days post administration of the radiotracer.

| Organs            | [ <sup>89</sup> Zr]Zr-DFO-daratumumab (%ID/g) | [ <sup>89</sup> Zr]Zr-DFO-daratumumab+Block (%ID/g) |
|-------------------|-----------------------------------------------|-----------------------------------------------------|
| Blood             | 11.05 ± 1.38                                  | 12.19 ± 1.49                                        |
| Lungs             | 8.58 ± 1.73                                   | 8.84 ± 0.10                                         |
| Liver             | 9.16 ± 1.47                                   | 7.53 ± 2.16                                         |
| Spleen            | 31.51 ± 6.10                                  | 10.57 ± 1.44                                        |
| Kidney            | 7.06 ± 1.11                                   | 7.28 ± 2.23                                         |
| Muscle            | 2.25 ± 0.32                                   | 2.54 ± 0.81                                         |
| Fat               | 2.21 ± 0.99                                   | 1.71 ± 0.82                                         |
| Heart             | 4.15 ± 0.35                                   | 4.23 ± 0.91                                         |
| Bone              | 8.94 ± 0.68                                   | 5.54 ± 1.07                                         |
| Adrenals          | 5.46 ± 2.96                                   | 4.73 ± 2.16                                         |
| Pancreas          | 2.20 ± 0.30                                   | 2.16 ± 0.44                                         |
| Stomach           | 1.53 ± 0.46                                   | 1.51 ± 0.44                                         |
| Sm intestine      | 1.91 ± 0.28                                   | 1.85 ± 0.35                                         |
| U large intestine | 1.94 ± 0.55                                   | 1.89 ± 0.30                                         |
| L large intestine | 1.39 ± 0.44                                   | 1.74 ± 0.61                                         |
| Tumor             | 27.7 ± 7.6                                    | 6.46 ± ND                                           |

**Supplemental Table 2:** Tissue biodistribution of [<sup>89</sup>Zr]Zr-DFO-daratumumab in MM1.S tumor bearing SCID mice (n=3) at 7 d post administration of the radiotracer. A separate set of mice was co-injected with 200-fold excess of unlabeled daratumumab.
